# Supplementary material for: Peripheral blood iNKT cell activation correlates with liver damage during acute hepatitis C
Source: PubMed Central journal article supplement (PMC8855829; doi:10.1172/jci.insight.155432), 2022-01-25
Supplement: jciinsight-7-155432-s072.pdf [file jciinsight-7-155432-s072.pdf]

## **Supplementary data**

### **Invariant Natural Killer T cells with an activated phenotype correlate with liver damage during acute hepatitis C**

Tina Senff<sup>#</sup>, Christopher Menne<sup>#</sup>, Christine Cosmovici, Lia L. Lewis-Ximenez, Jasneet Aneja, Ruth Broering, Arthur Y. Kim, Astrid Westendorf, Ulf Dittmer, Norbert Scherbaum, Georg M. Lauer, Jörg Timm

#### **Table of contents**

|                       |
|-----------------------|
| Supplementary Table 1 |
| Supplementary Fig. 1  |
| Supplementary Fig. 2  |
| Supplementary Fig. 3  |
| Supplementary Fig. 4  |
| Supplementary Fig. 5  |
| Supplementary Fig. 6  |
| Supplementary Fig. 7  |
| Supplementary Fig. 8  |
| Supplementary Fig. 9  |
| Supplementary Fig. 10 |

**Supplementary Table 1. Antibodies used in this work.**

| <b>Name</b>                                                         | <b>Supplier</b>                                              | <b>Cat no.</b> | <b>Clone no.</b> |
|---------------------------------------------------------------------|--------------------------------------------------------------|----------------|------------------|
| αGalCer loaded<br>CD1d dextramer<br>APC                             | Immudex (Virum<br>Denmark)                                   | XD8002         | n.a.             |
| CD1d<br>PerCPeFluor™710                                             | eBioscience<br>(Thermo Fisher<br>Scientific, Waltham,<br>MA) | 46-0016-42     | 51.1             |
| CD38 PerCP eFluor<br>710                                            | eBioscience                                                  | 46-0388-42     | HB7              |
| PE-Cy™7 Mouse<br>Anti-Human CD127                                   | BD Biosciences (San<br>Jose, CA)                             | 560822         | HIL-7R-M21       |
| CD161 PE-<br>Cyanine7                                               | eBioscience                                                  | 25-1619-42     | HP-3G10          |
| CD57 FITC                                                           | eBioscience                                                  | 11-0577-42     | TB01             |
| CD159a/NKG2A<br>PC7                                                 | Beckman Coulter<br>(Brea, CA)                                | B10246         | Z199             |
| Brilliant Violet 421™<br>anti-human CD279<br>PD-1                   | Biolegend (San<br>Diego, CA)                                 | 329920         | EH12.2H7         |
| Fixable ViabilityDye<br>eFluor® 506                                 | eBioscience                                                  | 65-0866        |                  |
| CD19 APC-eFluor®<br>780                                             | eBioscience                                                  | 47-0199-42     | HIB19            |
| PE-Cy™7 Mouse<br>Anti-Human<br>CD107a                               | BD Biosciences                                               | 561348         | H4A3             |
| Anti-Human IFN<br>gamma FITC                                        | eBioscience                                                  | 11-7319        | 4S.B3            |
| IL2 PerCP-<br>eFluor 710                                            | eBioscience                                                  | 46-7029-42     | MQ1-17H12        |
| CD4 PE                                                              | eBioscience                                                  | 12-0049-42     | RPA-T4           |
| CD8a eFluor® 450                                                    | eBioscience                                                  | 48-0088-42     | RPA-T8           |
| BUV395 Mouse Anti-<br>Human CD8                                     | BD Biosciences                                               | 563795         | RPA-T8           |
| BUV737 Mouse Anti-<br>Human CD4                                     | BD Biosciences                                               | 564306         | SK3              |
| Brilliant Violet 421™<br>anti-human TCR<br>Vα24-Jα18<br>(iNKT cell) | Biolegend                                                    | 342916         | 6B11             |
| FITC anti-human<br>CD69                                             | Biolegend                                                    | 310903         | FN50             |
| PE/Dazzle™ 594<br>anti-human CD3                                    | Biolegend                                                    | 300336         | HIT3a            |
| PE/Cy7 anti-human<br>CD38                                           | Biolegend                                                    | 356608         | HB-7             |
| LIVE/DEAD™<br>Fixable Near-IR<br>Dead Cell Stain Kit                | Invitrogen (Thermo<br>Fisher Scientific,<br>Waltham, MA)     | L34976         | n.a.             |
| BV786 Mouse Anti-<br>Human CD4                                      | BD Biosciences                                               | 740962         | RPA-T4           |
| CD38 PE-Cyanine7                                                    | eBioscience                                                  | 25-0389-42     | HIT2             |

|                                       |             |            |        |
|---------------------------------------|-------------|------------|--------|
| APC anti-human CD69                   | Biolegend   | 310910     | FN50   |
| CD3 PerCP-Cyanine5.5                  | eBioscience | 45-0037-42 | OKT3   |
| PE anti-human CD127 (IL-7R $\alpha$ ) | Biolegend   | 351304     | A019D5 |

**A**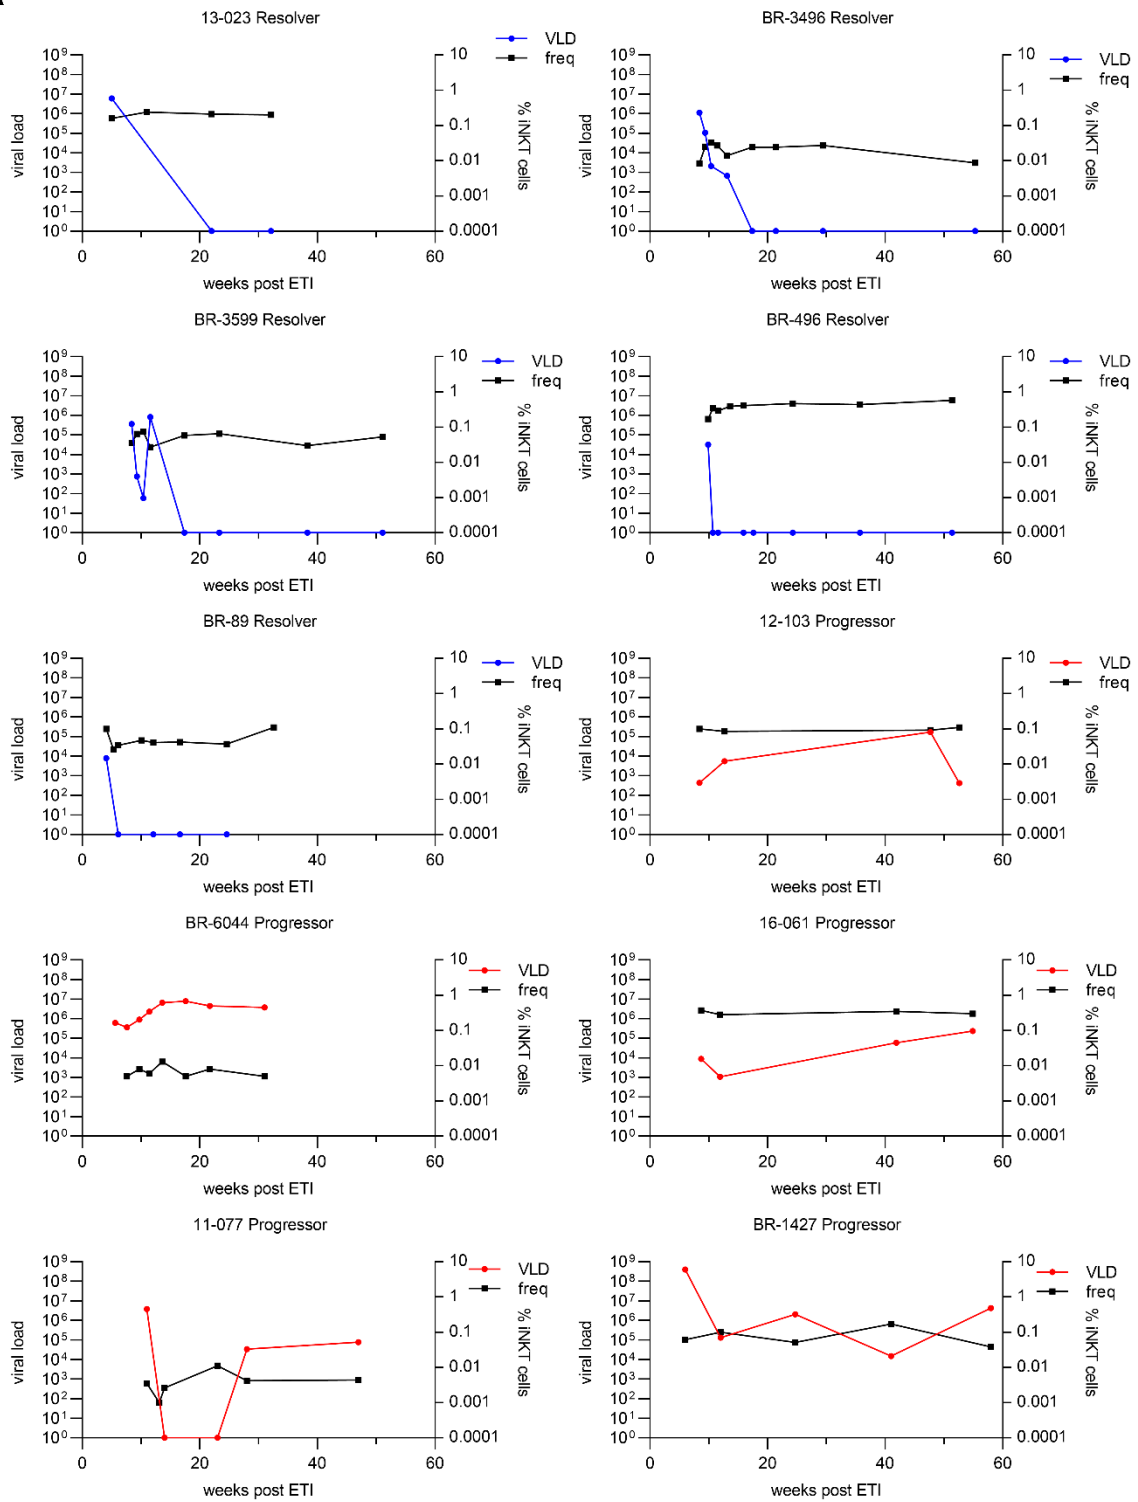

**B**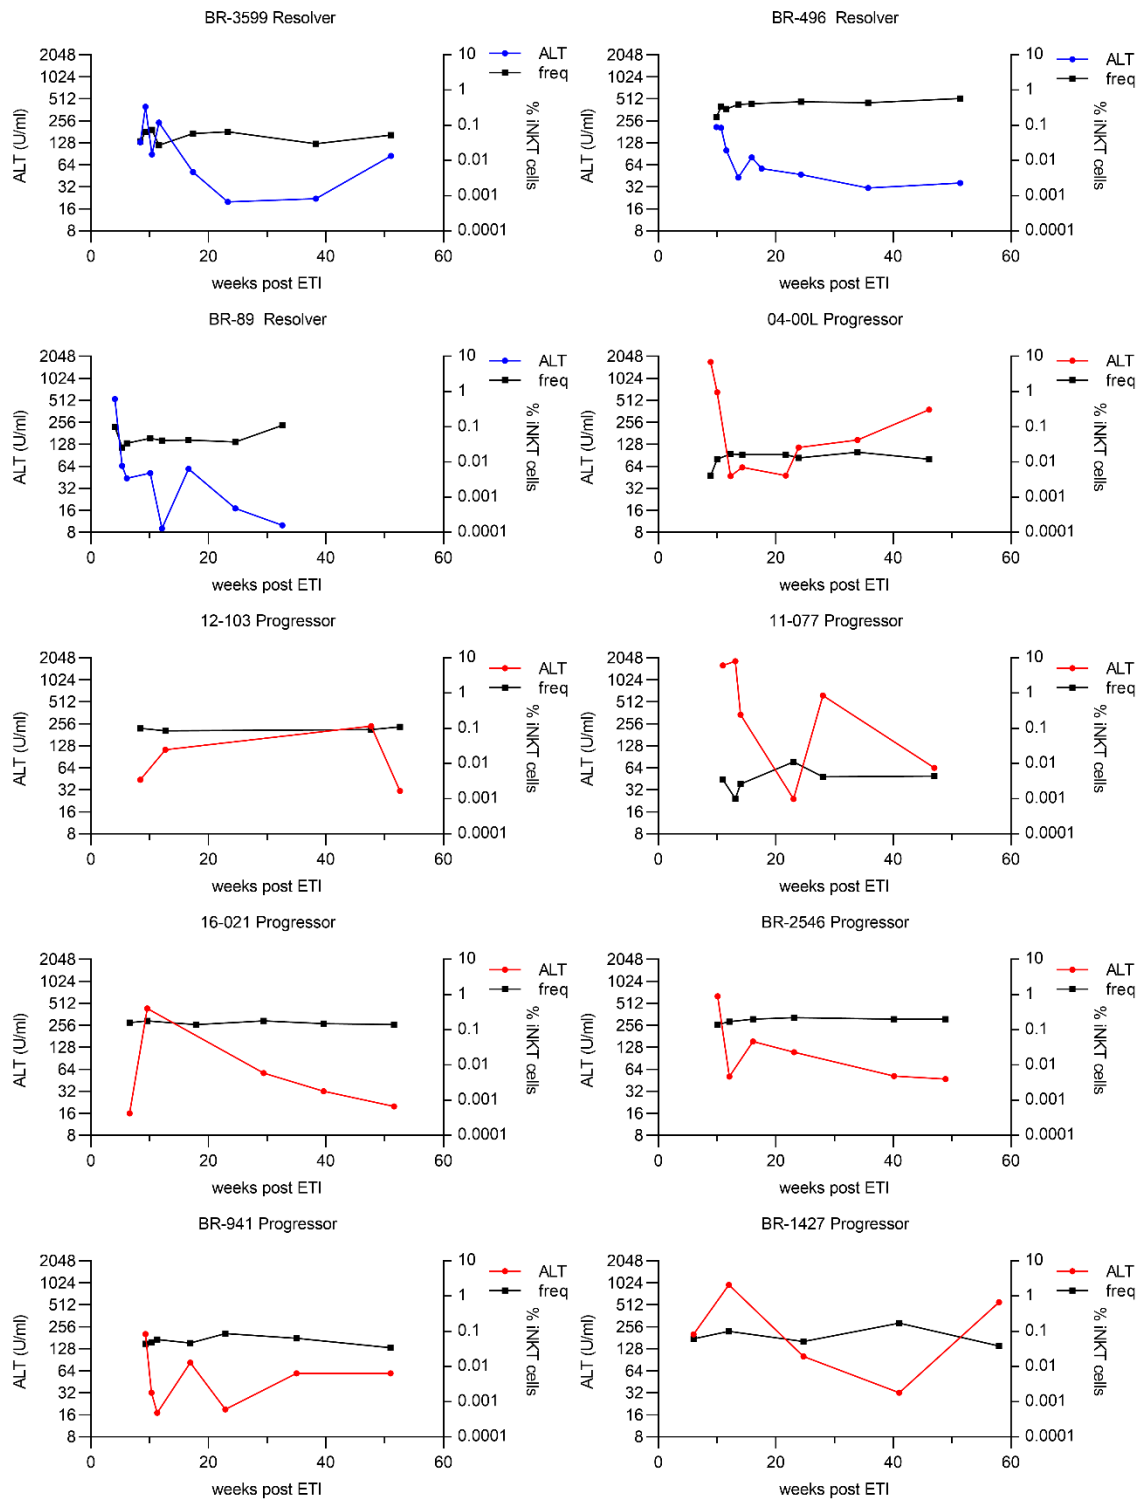

**Supplementary Fig. 1. Invariant NKT cell frequency is unaltered by viral replication or serum ALT levels.** Frequency of iNKT cells during the first year post ETI is depicted in black squares. Viral load (A) and ALT (B) is depicted by blue circles

for resolvers and red circles for chronic progressors. Exemplary patients that had the highest number of longitudinal samples with available clinical parameters are shown.

**A**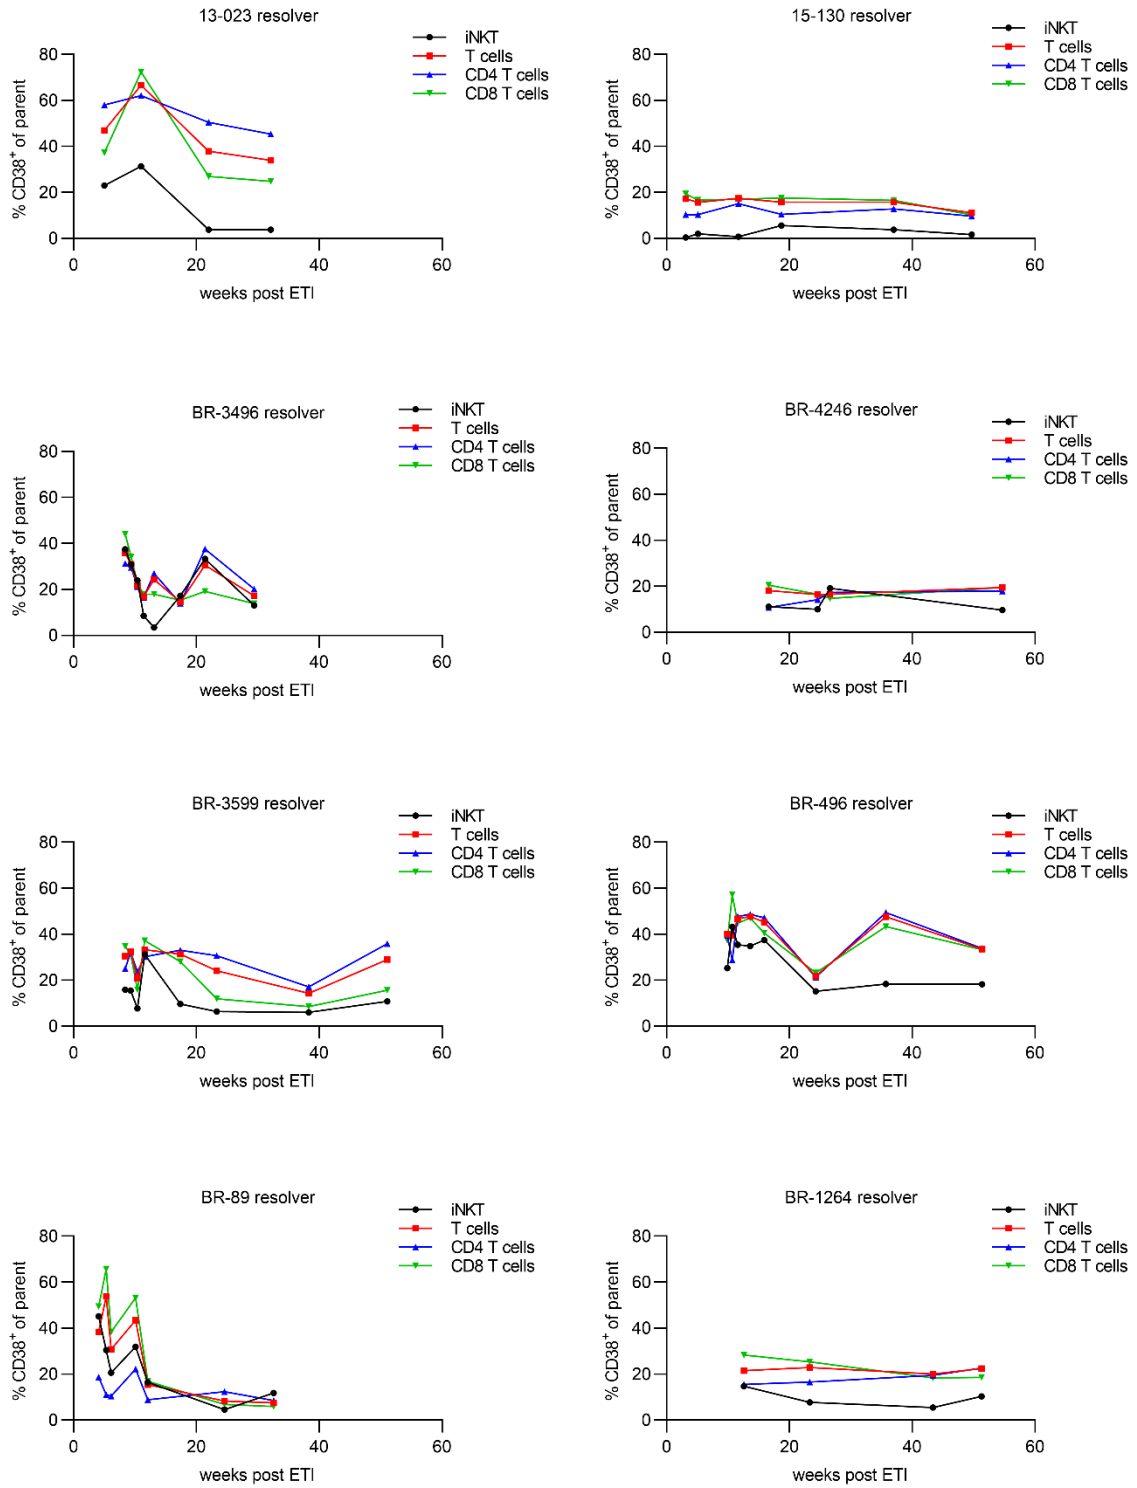

**B**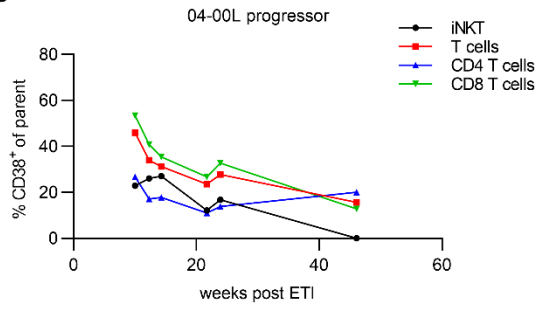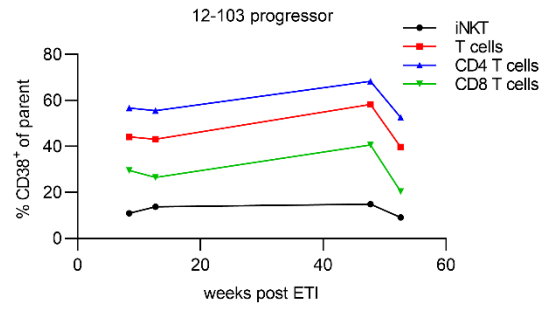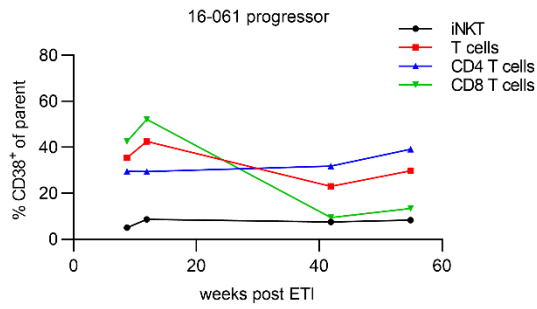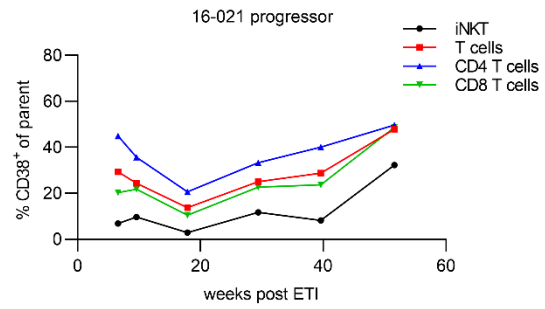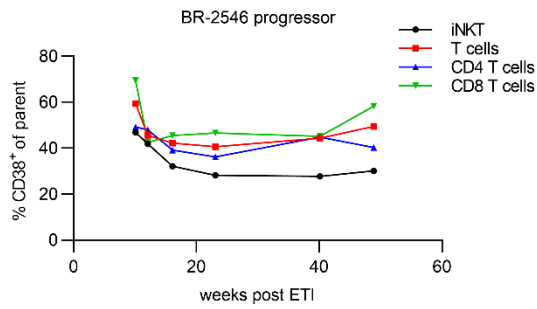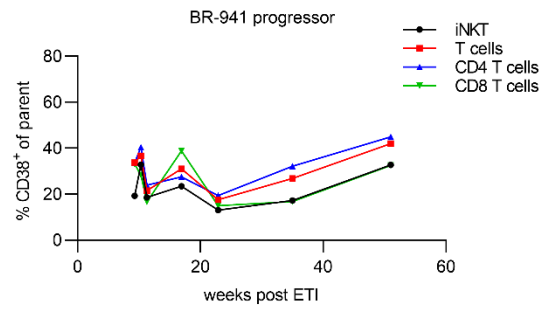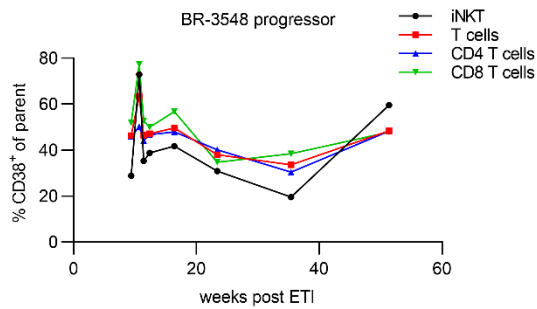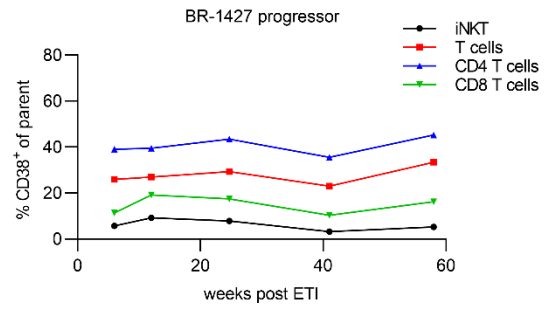



**C**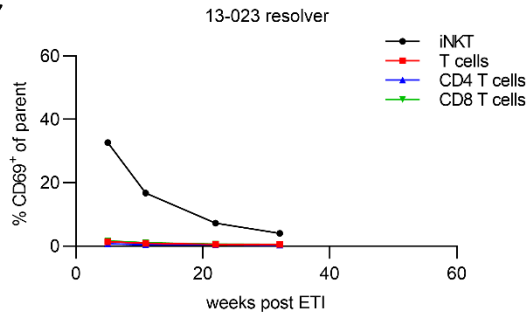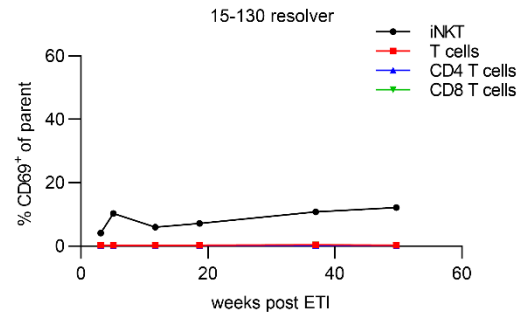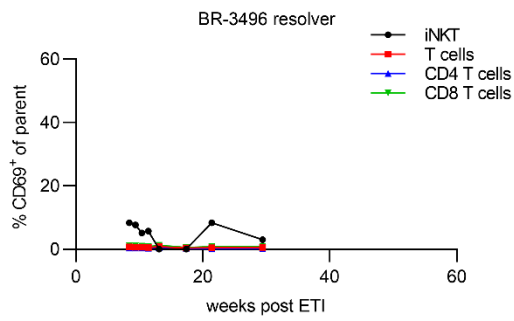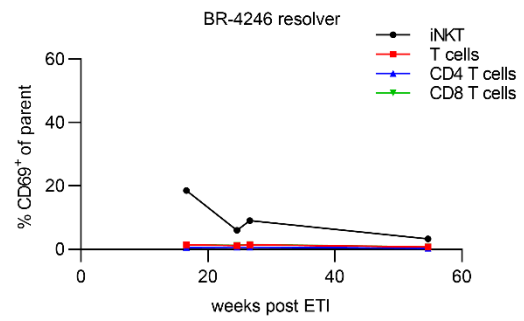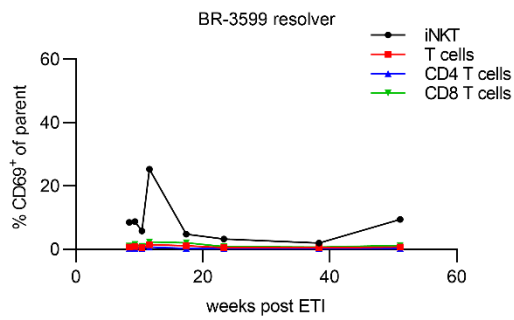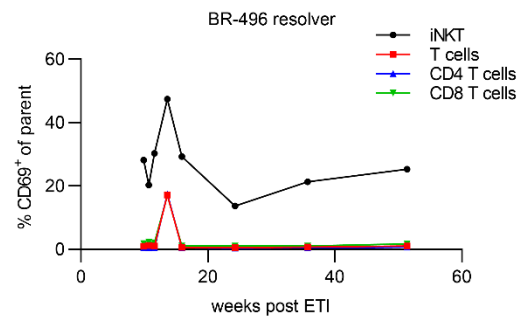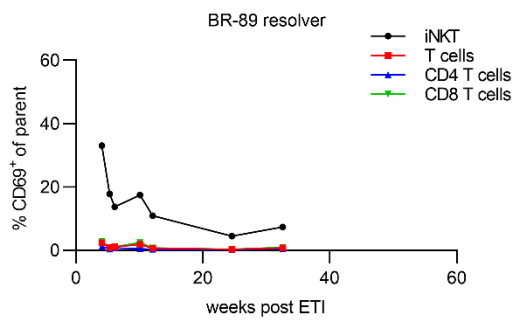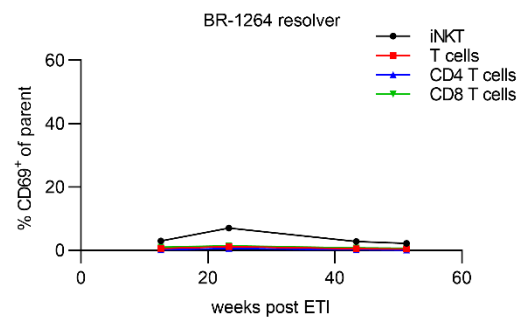

**D**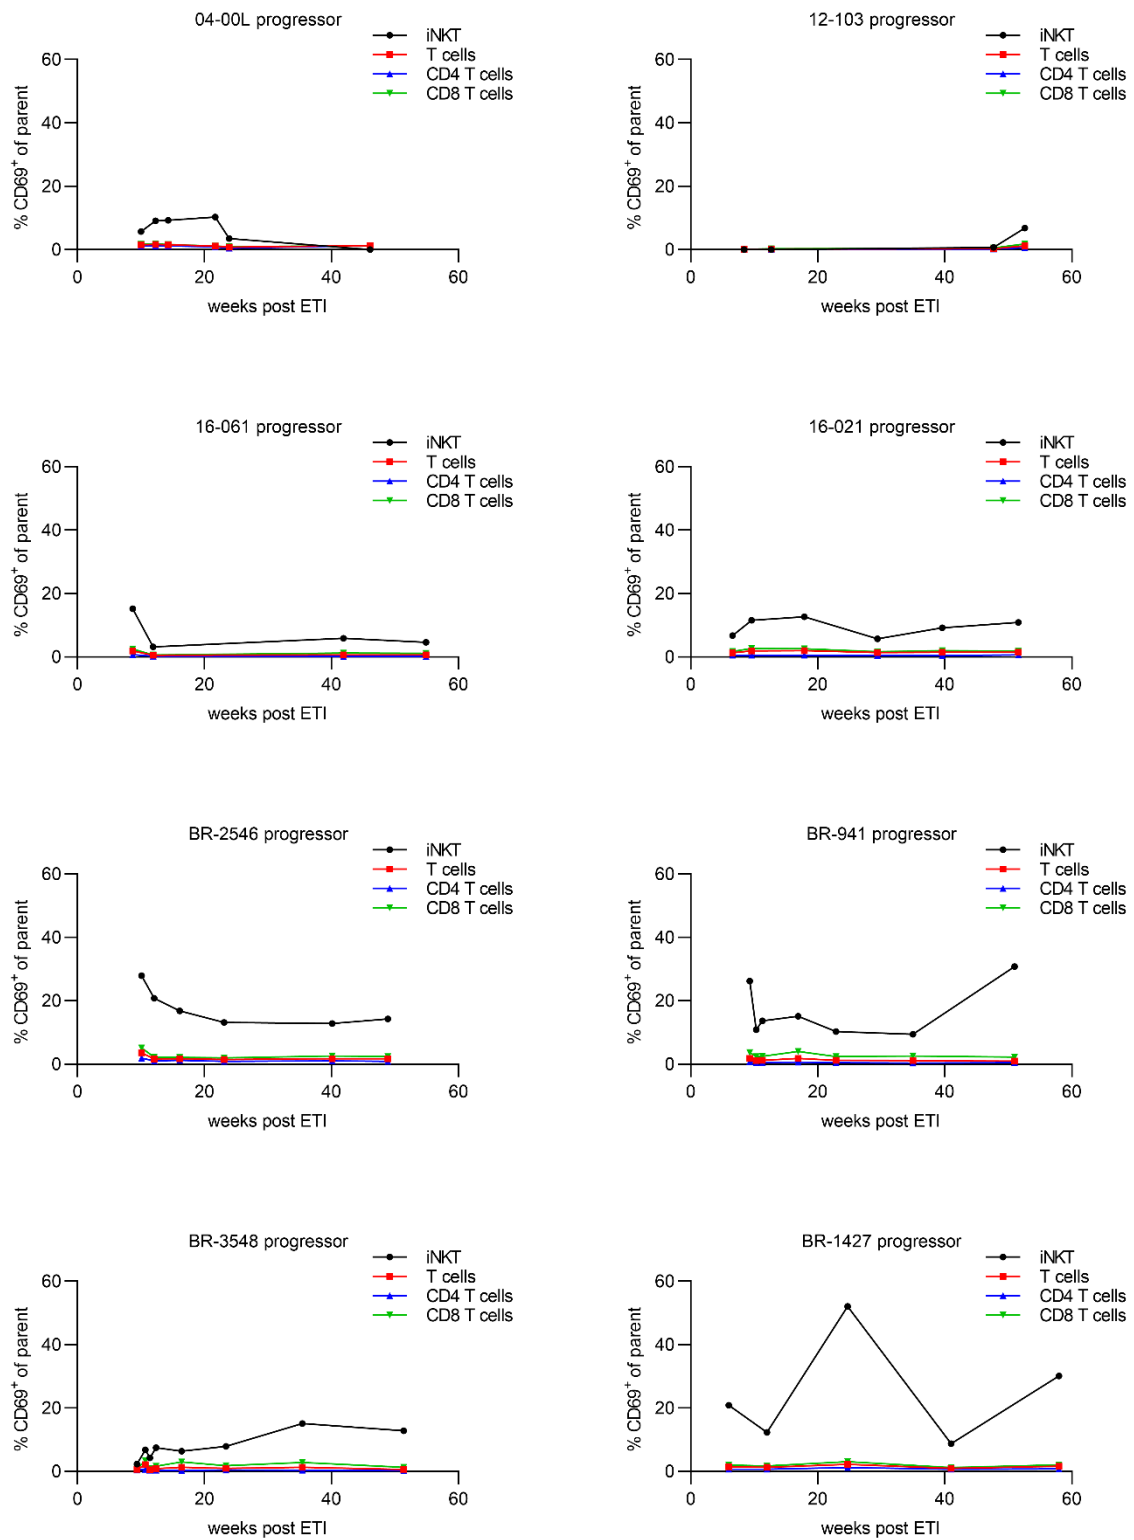**Supplementary Fig. 2. Frequency of activated iNKT and conventional T cells.**

Frequency of CD38<sup>+</sup> in resolvers (A) and progressors (B) and CD69<sup>+</sup> in resolvers (C) and progressors (D) iNKT cells as well as CD4<sup>+</sup> and CD8<sup>+</sup> conventional T cells

during the first year post ETI is shown. Patients with samples available from four or more time points are shown.



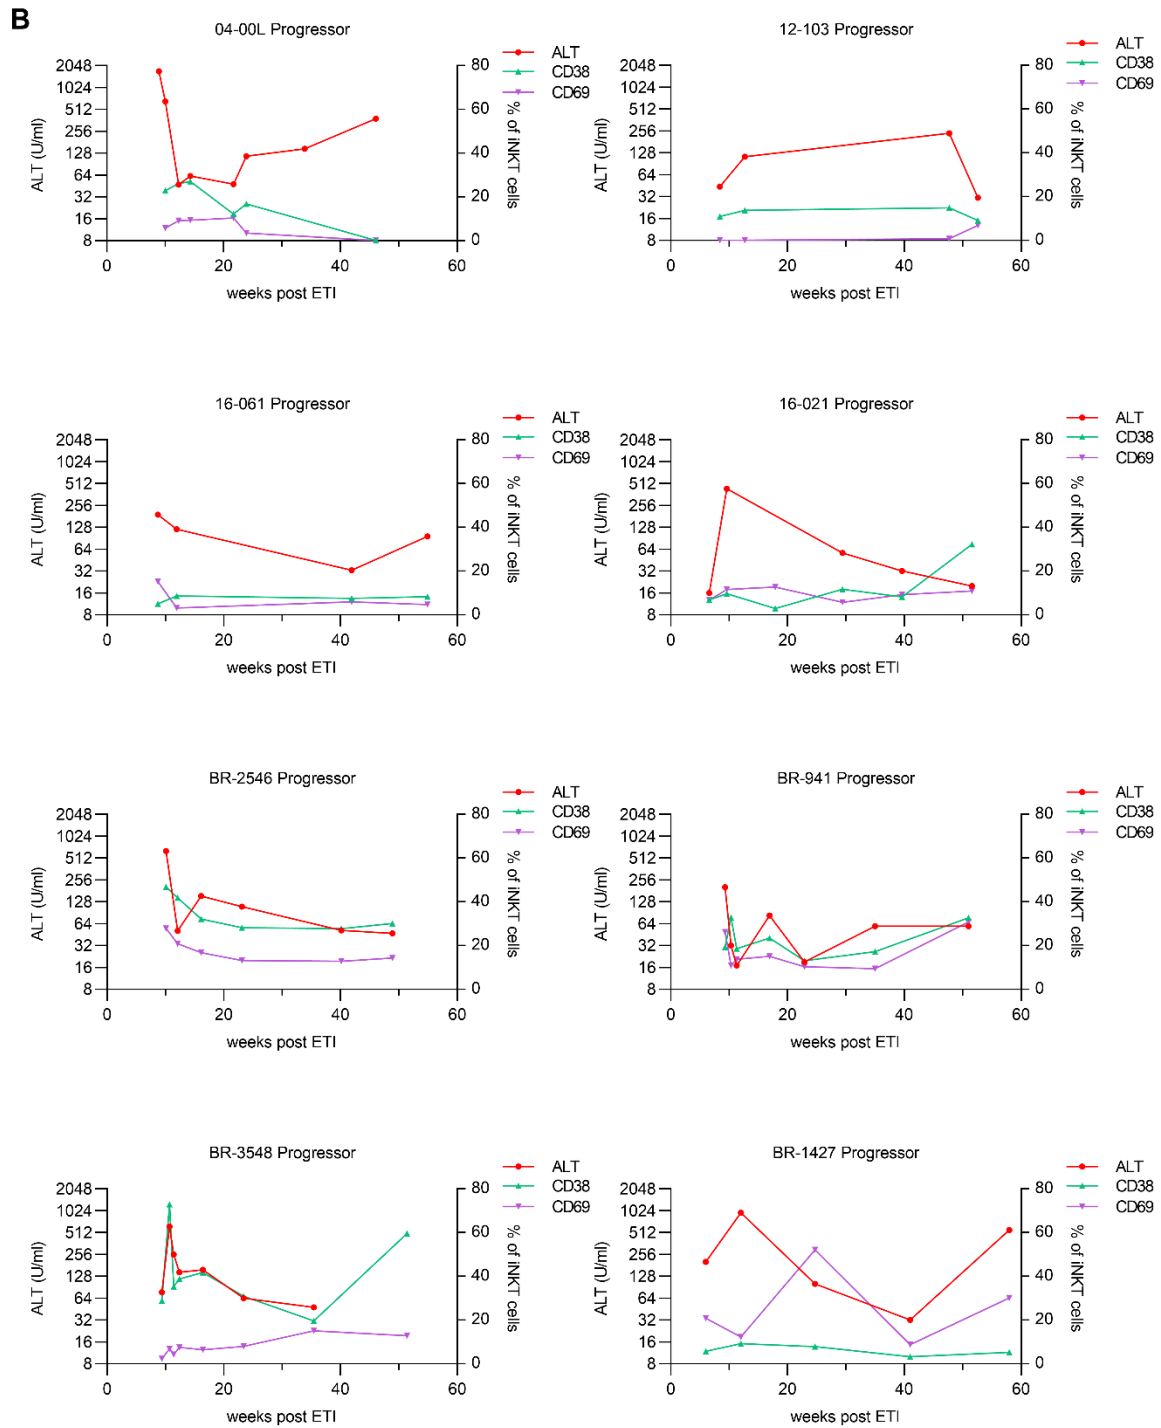

**Supplementary Fig. 3. Invariant NKT cell activation and serum ALT levels in individual patients.** Frequency of CD38<sup>+</sup> (green) and CD69<sup>+</sup> (purple) iNKT cells during the first year post ETI is shown. Blue (A, resolvers) or red (B, progressors) circles depict ALT levels. Exemplary patients that had the highest number of longitudinal samples with known ALT levels are shown.

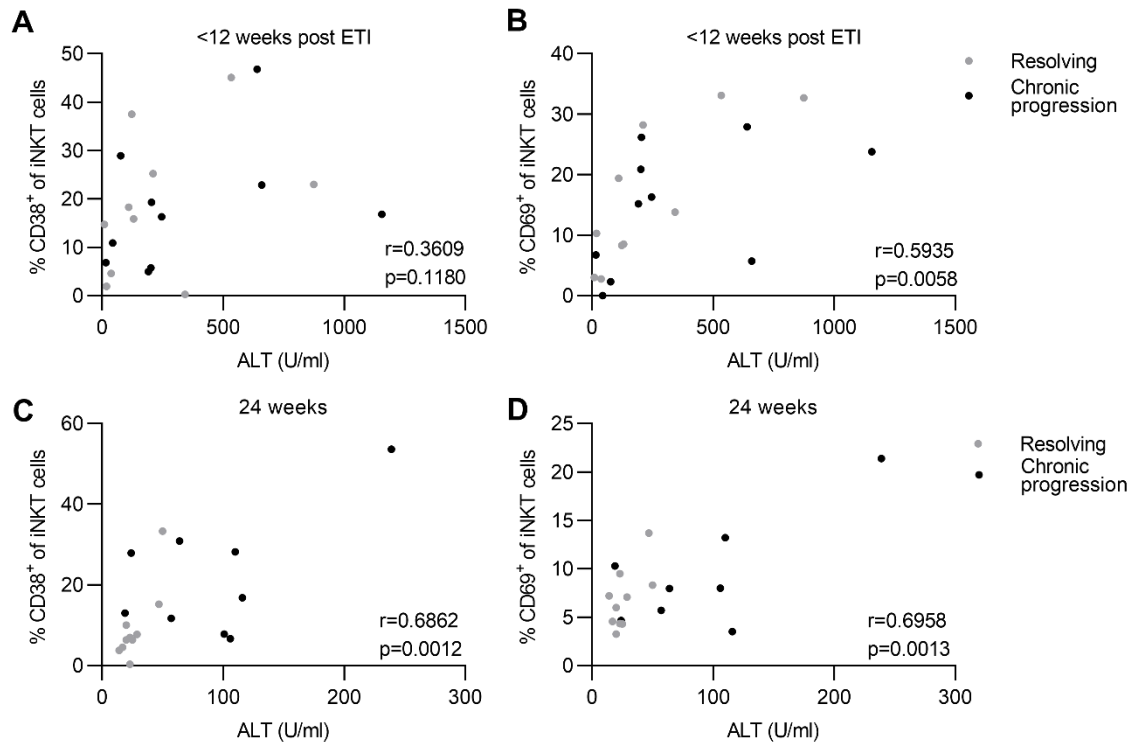

**Supplementary Fig. 4. Invariant NKT cell activation and serum ALT levels at individual time points.** (A + B) Correlation of ALT levels with the frequency of CD38<sup>+</sup> (A) and CD69<sup>+</sup> (B) iNKT cells is shown for the earliest available sample with known ALT levels that was sampled prior to 12 weeks post ETI (n = 20). (C + D) Correlation of ALT levels with the frequency of CD38<sup>+</sup> (C) and CD69<sup>+</sup> (D) iNKT cells is shown 6 months post ETI (16 to 32 weeks, n = 19). Each dot represents an individual patient. Resolvers and progressors are depicted by gray and black circles, respectively. Pearson correlation coefficient was used.

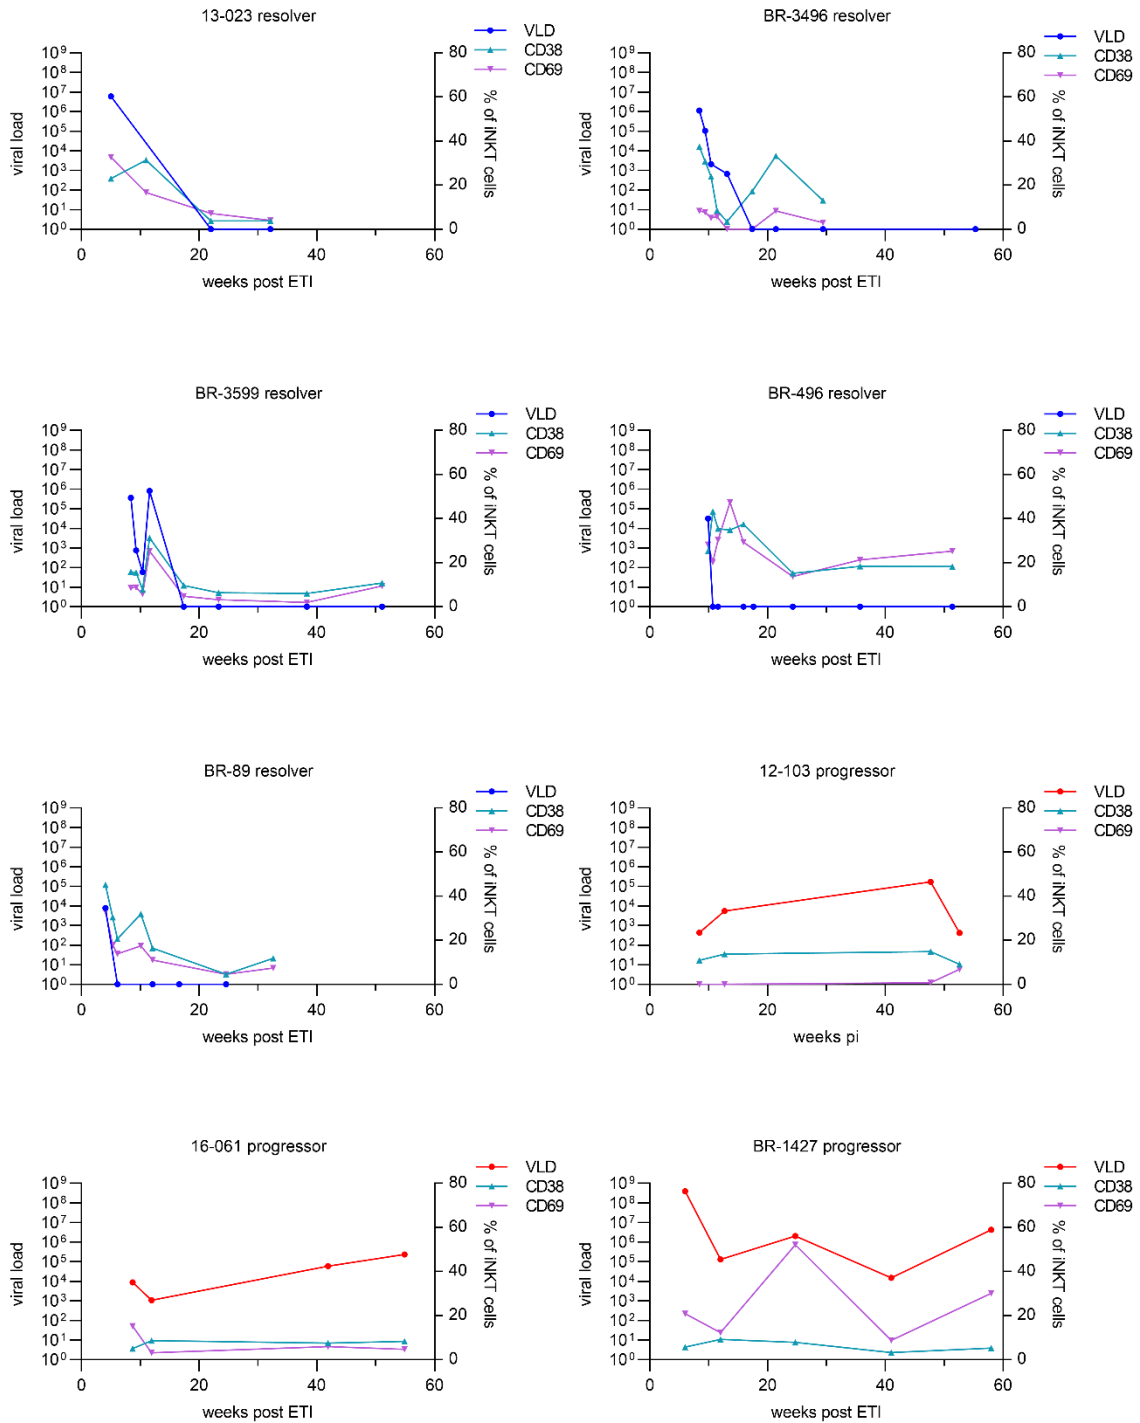

**Supplementary Fig. 5. Invariant NKT cell activation and viral load.** Frequency of CD38<sup>+</sup> (green) and CD69<sup>+</sup> (purple) iNKT cells during the first year post ETI is shown. Blue (resolvers) or red (progressors) circles depict viral load. Exemplary patients that had the highest number of longitudinal samples with analysed viral load are shown.

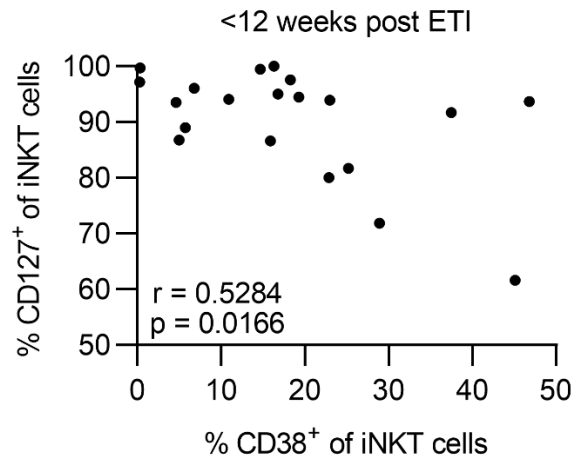

**Supplementary Fig. 6. Frequency of CD38<sup>+</sup> and CD127<sup>+</sup> iNKT cells during early acute HCV infection.** PBMC samples from the acute phase of HCV infection were analyzed by flow cytometry (n = 20). Expression of CD38 and CD127 was determined at the earliest available time point prior to 12 weeks post ETI and their correlation analysed by Pearson correlation analysis. Samples with less than 20 iNKT cells were excluded from the analysis.



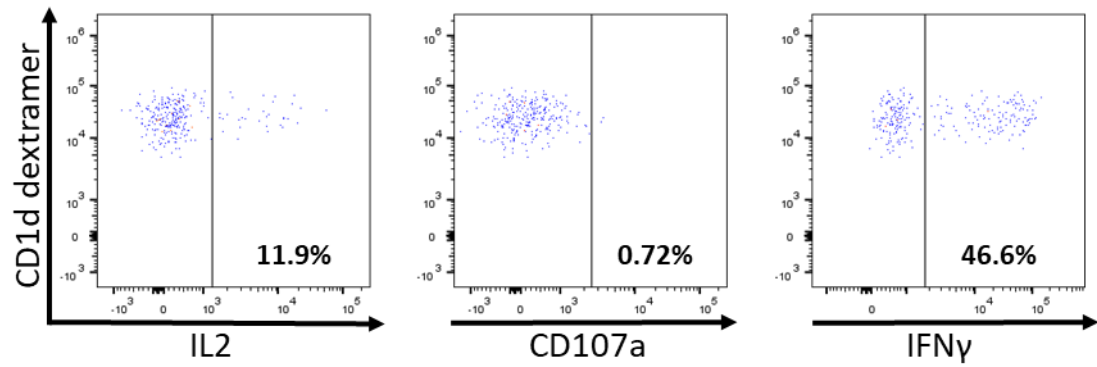

**Supplementary Fig. 7. Intracellular cytokine staining of iNKT cell ex vivo.**

Lymphocytes were identified and dead cells, doublets, and CD19<sup>+</sup> cells, due to the unspecific binding of the CD1d dextramer to B-cells, were excluded. iNKT cells were defined as CD3<sup>+</sup> and  $\alpha$ GalCer loaded CD1d dextramer<sup>+</sup>. Exemplary IFN $\gamma$ , IL-2 production and CD107a expression by iNKT cells is shown.

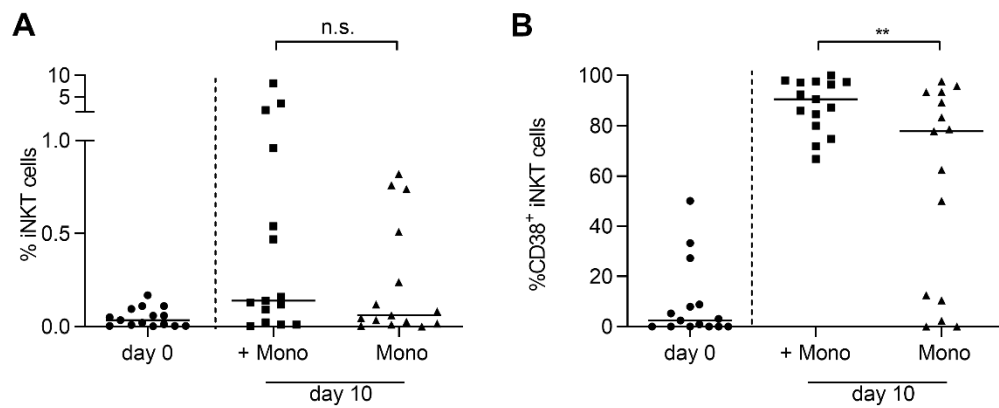

**Supplementary Fig. 8. Depletion of CD1d results in impaired iNKT activation.**

Frequency (A) and CD38<sup>+</sup> expression (B) of iNKT cells ex vivo and after 10d of in vitro expansion with  $\alpha$ GalCer and IL-2 from whole or monocyte depleted PBMCs is shown (n=15, Wilcoxon matched-pairs signed rank test, \*\*>0.01). Monocytes were depleted by adherence to the plastic surface of the cell culture vessel for 3h at 37°C in R10. Suspension cells were collected without disturbing the adherent cells and gated like described in the methods section. Invariant NKT cells were defined via  $\alpha$ GalCer loaded CD1d Dextramer staining.

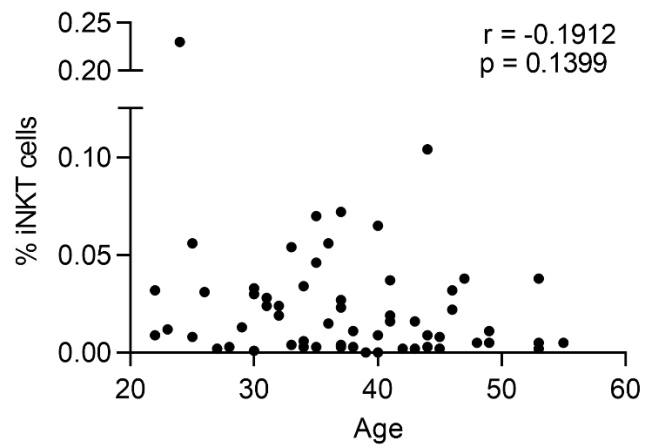

**Supplementary Fig. 9. Association between the frequency of iNKT cells and patient age in PWID cohort.** All patients independent of infection status were included in the analysis. Age in years and iNKT cell frequency of all CD3<sup>+</sup> lymphocytes is shown. Correlation was calculated by Spearman correlation analysis (n=61).

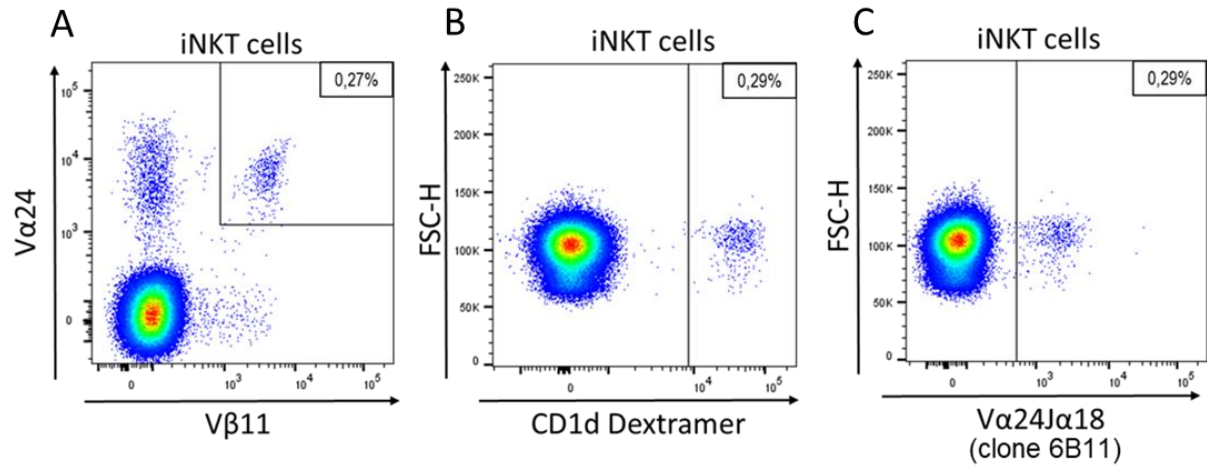

**Supplementary Fig. 10. Comparison of iNKT staining reagents.** iNKT cells were stained with (A) Vα24 and Vβ11, (B) αGalCer loaded CD1d Dextramer or (C) Vα24Ja18 antibody. PBMCs of healthy donors were stained like described in the methods section and gated on viable CD3<sup>+</sup> lymphocytes.
